# Supplementary material for: Long‐Term Follow‐Up of HLA‐A2+ Patients with High‐Risk, Hormone‐Sensitive Prostate Cancer Vaccinated with the Prostate Specific Antigen Peptide Homologue (PSA146‐154)
Source: Hindawi journal article supplement (doi:10.1155/2010/473453), 2010-01-01
Supplement: f1 [file 473453.f1.pdf]

Supplemental Table 1: Induction of specific cytokine responses

| Patient code | Specific cytokine levels post vaccination <sup>1</sup> (pg/ml) |        |               |       |       |       |       |       |
|--------------|----------------------------------------------------------------|--------|---------------|-------|-------|-------|-------|-------|
|              | IFN- $\gamma$                                                  |        | TNF- $\alpha$ |       | IL-4  |       | IL-5  |       |
|              | wk26                                                           | wk52   | wk26          | wk52  | wk26  | wk52  | wk26  | wk52  |
| UPIN13       | 141.4                                                          | 0      | 43.5          | 3.8   | 0     | 0     | 824.4 | 25.5  |
| UPIN16       | 44.4                                                           | 241.6  | 0             | 100.2 | 38.4  | 53.6  | 0     | 532.9 |
| UPIN28       | 525.4                                                          | 847.9  | 33.2          | 134.6 | 86.1  | 80.9  | 989.8 | 373.7 |
| UPIN50       | -20.7                                                          | -20.7  | 0             | 0     | 0     | 0     | 0     | 0     |
| UPIN55       | 262.7                                                          | 66     | 12.3          | 2.5   | 18.7  | 9.6   | 77.4  | 37.8  |
| UPIN40       | 313.5                                                          | 488.9  | 31.5          | 39.9  | 34    | 0     | 320.9 | 0     |
| UPIN45       | 30.6                                                           | 88.8   | 25.8          | 3     | 2.5   | 7.2   | 0     | 8.3   |
| UPIN71       | 20.9                                                           | 31     | 0             | 0     | 0     | 0     | 0     | 0     |
| UPIN43       | -3.5                                                           | -11.2  | 0             | -0.5  | 1.1   | 0     | -0.2  | -0.2  |
| UPIN2        | 63.9                                                           | -50.2  | 10.7          | 0     | 9.3   | 13.1  | 21.8  | 0     |
| UPIN21       | 1064.5                                                         | -9.3   | 18.7          | 0     | 30.4  | 0     | 92    | 0     |
| UPIN27       | 2236                                                           | ND     | 37            | ND    | 13.8  | ND    | 1.5   | ND    |
| UPIN38       | 112.1                                                          | 1.3    | 2.8           | 0     | 11.5  | 0     | 18.9  | 0     |
| UPIN82       | -3.2                                                           | -3.2   | -0.2          | -0.2  | 0     | 0     | -2.4  | -2.4  |
| UPIN49       | 0                                                              | 113.5  | 0             | 113.5 | 0     | 79.9  | 0     | 0     |
| UPIN69       | 1293.5                                                         | 133.4  | 26.7          | 0     | 20.4  | 0     | 46.7  | 0.1   |
| UPIN88       | -34.3                                                          | 230.4  | 0             | 4.6   | 0     | 2.4   | -2.9  | 0.8   |
| UPIN53       | 25.3                                                           | 2417.4 | 0             | 0.3   | 0.3   | 94.3  | -1.2  | 29.8  |
| UPIN81       | -2.9                                                           | -2.9   | 0             | 0     | 0     | 0     | 0     | 0     |
| UPIN51       | 0                                                              | 0      | 0             | 0     | 0     | 0     | 0     | 0.2   |
| UPIN26       | 255.5                                                          | 1211.4 | -0.3          | 69.4  | 10    | 201   | 2     | 875.2 |
| UPIN32       | 0                                                              | 0      | 0             | 0     | 0     | 0     | 0     | 0.7   |
| UPIN35       | -10.4                                                          | 24.3   | 0             | 0.3   | -12.4 | -8.5  | 0     | 46.4  |
| UPIN37       | 1.4                                                            | 0      | 0             | 0     | 0     | 0     | 0     | 0     |
| UPIN85       | 0                                                              | 0      | 0             | 0.7   | 0     | 0     | 0     | 0     |
| UPIN89       | -46.9                                                          | -46.9  | -1.2          | -1.2  | -13   | -12.7 | -16.8 | -16.8 |
| UPIN67       | 40.3                                                           | 0      | 0             | 0     | 0     | 0     | -3.5  | -2.6  |
| UPIN70       | 130.9                                                          | 0      | -0.6          | -0.6  | -4.7  | -4.7  | -0.6  | -2.1  |

<sup>1</sup>Cytokine responses were evaluated on PBMC at pre-vaccine, week 26 and 52 as detailed in methods section. Changes in cytokine levels post-vaccine minus the pre-vaccine levels are shown. ND denotes not done.
