# Supplementary material for: Long‐Term Follow‐Up of HLA‐A2+ Patients with High‐Risk, Hormone‐Sensitive Prostate Cancer Vaccinated with the Prostate Specific Antigen Peptide Homologue (PSA146‐154)
Source: Hindawi journal article supplement (doi:10.1155/2010/473453), 2010-01-01
Supplement: f2 [file 473453.f2.pdf]

Supplemental Table 2: Genes which discriminate among immune responders versus non responders

|    | Para<br>metric<br>p-<br>value | F<br>D<br>R | Permu<br>tation<br>p-value | Geo<br>m<br>mean<br>of<br>inten<br>sities<br>in<br>class<br>1 | Geo<br>m<br>mean<br>of<br>inten<br>sities<br>in<br>class<br>2 | Fol<br>d-<br>cha<br>nge | Probe<br>set                 | An<br>no-<br>tati<br>ons | Gene<br>symbol          | Description                                             |
|----|-------------------------------|-------------|----------------------------|---------------------------------------------------------------|---------------------------------------------------------------|-------------------------|------------------------------|--------------------------|-------------------------|---------------------------------------------------------|
| 1  | 7.7e-05                       | 1           | 0.0079365                  | 37.04                                                         | 77.38                                                         | 0.48                    | <a href="#">226989_at</a>    | <a href="#">Info</a>     | <a href="#">RGMB</a>    | RGM domain family, member B                             |
| 2  | 9.44e-05                      | 1           | 0.0079365                  | 300.96                                                        | 165.39                                                        | 1.82                    | <a href="#">242140_at</a>    | <a href="#">Info</a>     | <a href="#">NA</a>      | NA                                                      |
| 3  | 0.0001041                     | 1           | 0.0079365                  | 30.62                                                         | 19.31                                                         | 1.59                    | <a href="#">226120_at</a>    | <a href="#">Info</a>     | <a href="#">TTC8</a>    | tetratricopeptide repeat domain 8                       |
| 4  | 0.0002027                     | 1           | 0.015873                   | 79.4                                                          | 310.51                                                        | 0.26                    | <a href="#">205767_at</a>    | <a href="#">Info</a>     | <a href="#">EREG</a>    | epiregulin                                              |
| 5  | 0.0002285                     | 1           | 0.0079365                  | 261.25                                                        | 167.66                                                        | 1.56                    | <a href="#">242139_s_at</a>  | <a href="#">Info</a>     | <a href="#">NA</a>      | NA                                                      |
| 6  | 0.0002735                     | 1           | 0.0079365                  | 358.97                                                        | 582.01                                                        | 0.62                    | <a href="#">212249_at</a>    | <a href="#">Info</a>     | <a href="#">PIK3R1</a>  | phosphoinositide-3-kinase, regulatory subunit 1 (alpha) |
| 7  | 0.000321                      | 1           | 0.015873                   | 369.33                                                        | 233.51                                                        | 1.58                    | <a href="#">207181_s_at</a>  | <a href="#">Info</a>     | <a href="#">CASP7</a>   | caspase 7, apoptosis-related cysteine peptidase         |
| 8  | 0.0004123                     | 1           | 0.0079365                  | 24                                                            | 39.97                                                         | 0.6                     | <a href="#">238577_s_at</a>  | <a href="#">Info</a>     | <a href="#">TSHZ2</a>   | teashirt zinc finger homeobox 2                         |
| 9  | 0.0004417                     | 1           | 0.015873                   | 71.93                                                         | 37.56                                                         | 1.92                    | <a href="#">235549_at</a>    | <a href="#">Info</a>     | <a href="#">RNF144B</a> | ring finger protein 144B                                |
| 10 | 0.0004577                     | 1           | 0.015873                   | 87.73                                                         | 130.55                                                        | 0.67                    | <a href="#">214180_at</a>    | <a href="#">Info</a>     | <a href="#">MAN1C1</a>  | mannosidase, alpha, class 1C, member 1                  |
| 11 | 0.0004661                     | 1           | 0.0079365                  | 302.66                                                        | 513.53                                                        | 0.59                    | <a href="#">1552634_a_at</a> | <a href="#">Info</a>     | <a href="#">ZNF101</a>  | zinc finger protein 101                                 |
| 12 | 0.0004936                     | 1           | 0.0079365                  | 29.78                                                         | 16.73                                                         | 1.78                    | <a href="#">220545_s_at</a>  | <a href="#">Info</a>     | <a href="#">TSKS</a>    | testis-specific serine kinase substrate                 |
| 13 | 0.0005429                     | 1           | 0.0079365                  | 81.07                                                         | 134.14                                                        | 0.6                     | <a href="#">211721_s_at</a>  | <a href="#">Info</a>     | <a href="#">ZNF551</a>  | zinc finger protein 551                                 |
| 1  | 0.0005                        | 1           | 0.0079                     | 836.6                                                         | 337.1                                                         | 2.48                    | <a href="#">205552</a>       | <a href="#">Info</a>     | <a href="#">OAS1</a>    | 2',5'-oligoadenylate                                    |

|    |           |   |           |         |         |      |                              |                      |                          |                                                       |
|----|-----------|---|-----------|---------|---------|------|------------------------------|----------------------|--------------------------|-------------------------------------------------------|
| 4  | 824       |   | 365       | 7       | 3       |      | <a href="#">_s_at</a>        |                      |                          | synthetase 1, 40/46kDa                                |
| 15 | 0.0005932 | 1 | 0.0079365 | 251.05  | 404.66  | 0.62 | <a href="#">227748_at</a>    | <a href="#">Info</a> | <a href="#">CCBL2</a>    | cysteine conjugate-beta lyase 2                       |
| 16 | 0.0006024 | 1 | 0.015873  | 149.5   | 96.59   | 1.55 | <a href="#">218729_at</a>    | <a href="#">Info</a> | <a href="#">LXN</a>      | latexin                                               |
| 17 | 0.0006171 | 1 | 0.015873  | 42.28   | 28.51   | 1.48 | <a href="#">210359_at</a>    | <a href="#">Info</a> | <a href="#">MTSS1</a>    | metastasis suppressor 1                               |
| 18 | 0.0006317 | 1 | 0.0079365 | 718.82  | 1067.28 | 0.67 | <a href="#">208078_s_at</a>  | <a href="#">Info</a> | <a href="#">NA</a>       | NA                                                    |
| 19 | 0.0006436 | 1 | 0.0079365 | 275.9   | 380.02  | 0.73 | <a href="#">210281_s_at</a>  | <a href="#">Info</a> | <a href="#">ZMYM2</a>    | zinc finger, MYM-type 2                               |
| 20 | 0.0006693 | 1 | 0.0079365 | 374.69  | 838.19  | 0.45 | <a href="#">235213_at</a>    | <a href="#">Info</a> | <a href="#">NA</a>       | NA                                                    |
| 21 | 0.0007135 | 1 | 0.0079365 | 90.55   | 167.69  | 0.54 | <a href="#">1566448_at</a>   | <a href="#">Info</a> | <a href="#">CD6</a>      | CD6 molecule                                          |
| 22 | 0.0008871 | 1 | 0.015873  | 222.66  | 324.87  | 0.69 | <a href="#">211282_x_at</a>  | <a href="#">Info</a> | <a href="#">TNFRSF25</a> | tumor necrosis factor receptor superfamily, member 25 |
| 23 | 0.0009587 | 1 | 0.015873  | 4035.16 | 1964.19 | 2.05 | <a href="#">204006_s_at</a>  | <a href="#">Info</a> | <a href="#">NA</a>       | NA                                                    |
| 24 | 0.0009748 | 1 | 0.0079365 | 70.75   | 23.39   | 3.02 | <a href="#">219955_at</a>    | <a href="#">Info</a> | <a href="#">L1TD1</a>    | LINE-1 type transposase domain containing 1           |
| 25 | 0.0009946 | 1 | 0.0079365 | 694.23  | 529.76  | 1.31 | <a href="#">224331_s_at</a>  | <a href="#">Info</a> | <a href="#">MRPL36</a>   | mitochondrial ribosomal protein L36                   |
| 26 | 0.0010349 | 1 | 0.015873  | 236.62  | 177.09  | 1.34 | <a href="#">213526_s_at</a>  | <a href="#">Info</a> | <a href="#">LIN37</a>    | lin-37 homolog (C. elegans)                           |
| 27 | 0.0010696 | 1 | 0.015873  | 53.64   | 23.45   | 2.29 | <a href="#">1554340_a_at</a> | <a href="#">Info</a> | <a href="#">C1orf187</a> | chromosome 1 open reading frame 187                   |
| 28 | 0.0010947 | 1 | 0.0079365 | 1408.76 | 348.23  | 4.05 | <a href="#">202869_at</a>    | <a href="#">Info</a> | <a href="#">OAS1</a>     | 2',5'-oligoadenylate synthetase 1, 40/46kDa           |
| 29 | 0.0011059 | 1 | 0.015873  | 76.34   | 52.66   | 1.45 | <a href="#">231396_s_at</a>  | <a href="#">Info</a> | <a href="#">FAM126A</a>  | family with sequence similarity 126, member A         |
| 30 | 0.0011347 | 1 | 0.015873  | 345.08  | 538.14  | 0.64 | <a href="#">225884_s_at</a>  | <a href="#">Info</a> | <a href="#">GZF1</a>     | GDNF-inducible zinc finger protein 1                  |

|    |           |   |           |         |         |      |                              |                      |                          |                                                                |
|----|-----------|---|-----------|---------|---------|------|------------------------------|----------------------|--------------------------|----------------------------------------------------------------|
| 31 | 0.0011408 | 1 | 0.0079365 | 45.88   | 61.72   | 0.74 | <a href="#">229809_at</a>    | <a href="#">Info</a> | <a href="#">POU6F1</a>   | POU class 6 homeobox 1                                         |
| 32 | 0.0012002 | 1 | 0.0079365 | 66.51   | 106.51  | 0.62 | <a href="#">225611_at</a>    | <a href="#">Info</a> | <a href="#">MAST4</a>    | microtubule associated serine/threonine kinase family member 4 |
| 33 | 0.001283  | 1 | 0.015873  | 848.3   | 1377.88 | 0.62 | <a href="#">200732_s_at</a>  | <a href="#">Info</a> | <a href="#">PTP4A1</a>   | protein tyrosine phosphatase type IVA, member 1                |
| 34 | 0.0013113 | 1 | 0.015873  | 1259.08 | 678.25  | 1.86 | <a href="#">223210_at</a>    | <a href="#">Info</a> | <a href="#">CHURC1</a>   | churchill domain containing 1                                  |
| 35 | 0.0013356 | 1 | 0.0079365 | 301.79  | 448.79  | 0.67 | <a href="#">230499_at</a>    | <a href="#">Info</a> | <a href="#">NA</a>       | NA                                                             |
| 36 | 0.0013382 | 1 | 0.0238095 | 91.06   | 55.47   | 1.64 | <a href="#">210360_s_at</a>  | <a href="#">Info</a> | <a href="#">MTSS1</a>    | metastasis suppressor 1                                        |
| 37 | 0.0013829 | 1 | 0.0079365 | 90.94   | 205.89  | 0.44 | <a href="#">215592_at</a>    | <a href="#">Info</a> | <a href="#">NA</a>       | NA                                                             |
| 38 | 0.0013944 | 1 | 0.0238095 | 178.76  | 93.07   | 1.92 | <a href="#">1553176_at</a>   | <a href="#">Info</a> | <a href="#">SH2D1B</a>   | SH2 domain containing 1B                                       |
| 39 | 0.0014164 | 1 | 0.0079365 | 409.74  | 597.37  | 0.69 | <a href="#">221790_s_at</a>  | <a href="#">Info</a> | <a href="#">LDLRAPI1</a> | low density lipoprotein receptor adaptor protein 1             |
| 40 | 0.0014501 | 1 | 0.015873  | 159.23  | 483.35  | 0.33 | <a href="#">227722_at</a>    | <a href="#">Info</a> | <a href="#">RPS23</a>    | ribosomal protein S23                                          |
| 41 | 0.0014769 | 1 | 0.0238095 | 2738.12 | 1420.45 | 1.93 | <a href="#">203037_s_at</a>  | <a href="#">Info</a> | <a href="#">MTSS1</a>    | metastasis suppressor 1                                        |
| 42 | 0.0014932 | 1 | 0.0079365 | 29.54   | 18.28   | 1.62 | <a href="#">1558508_a_at</a> | <a href="#">Info</a> | <a href="#">C1orf53</a>  | chromosome 1 open reading frame 53                             |
| 43 | 0.0015351 | 1 | 0.0079365 | 364.23  | 133.07  | 2.74 | <a href="#">205844_at</a>    | <a href="#">Info</a> | <a href="#">VNN1</a>     | vanin 1                                                        |
| 44 | 0.0015388 | 1 | 0.015873  | 107.04  | 64.92   | 1.65 | <a href="#">228058_at</a>    | <a href="#">Info</a> | <a href="#">ZG16B</a>    | zymogen granule protein 16 homolog B (rat)                     |
| 45 | 0.001542  | 1 | 0.0079365 | 117.12  | 63.86   | 1.83 | <a href="#">214483_s_at</a>  | <a href="#">Info</a> | <a href="#">ARFIP1</a>   | ADP-ribosylation factor interacting protein 1                  |
| 46 | 0.0015609 | 1 | 0.015873  | 139.43  | 103.4   | 1.35 | <a href="#">200856_x_at</a>  | <a href="#">Info</a> | <a href="#">NA</a>       | NA                                                             |
| 47 | 0.0016394 | 1 | 0.0079365 | 128.59  | 89.15   | 1.44 | <a href="#">1568978_s_at</a> | <a href="#">Info</a> | <a href="#">C11orf21</a> | chromosome 11 open reading frame                               |

|    |           |   |           |        |        |      |                             |                      |                          |                                                       |
|----|-----------|---|-----------|--------|--------|------|-----------------------------|----------------------|--------------------------|-------------------------------------------------------|
|    |           |   |           |        |        |      |                             |                      |                          | 21                                                    |
| 48 | 0.0016716 | 1 | 0.015873  | 73.74  | 57.49  | 1.28 | <a href="#">222094_at</a>   | <a href="#">Info</a> | <a href="#">NA</a>       | NA                                                    |
| 49 | 0.001696  | 1 | 0.0079365 | 7.31   | 9.22   | 0.79 | <a href="#">239155_at</a>   | <a href="#">Info</a> | <a href="#">NA</a>       | NA                                                    |
| 50 | 0.0017288 | 1 | 0.0238095 | 472.99 | 56.68  | 8.34 | <a href="#">206834_at</a>   | <a href="#">Info</a> | <a href="#">HBD</a>      | hemoglobin, delta                                     |
| 51 | 0.001791  | 1 | 0.0079365 | 522.48 | 324.75 | 1.61 | <a href="#">230352_at</a>   | <a href="#">Info</a> | <a href="#">PRPS2</a>    | phosphoribosyl pyrophosphate synthetase 2             |
| 52 | 0.0019388 | 1 | 0.0079365 | 15.27  | 11.03  | 1.38 | <a href="#">1558305_at</a>  | <a href="#">Info</a> | <a href="#">GIGYF2</a>   | GRB10 interacting GYF protein 2                       |
| 53 | 0.0020334 | 1 | 0.0079365 | 26.82  | 35.45  | 0.76 | <a href="#">221880_s_at</a> | <a href="#">Info</a> | <a href="#">FAM174B</a>  | family with sequence similarity 174, member B         |
| 54 | 0.0020577 | 1 | 0.0079365 | 9.78   | 12.39  | 0.79 | <a href="#">243855_at</a>   | <a href="#">Info</a> | <a href="#">NA</a>       | NA                                                    |
| 55 | 0.0020966 | 1 | 0.015873  | 153.73 | 236.01 | 0.65 | <a href="#">211841_s_at</a> | <a href="#">Info</a> | <a href="#">TNFRSF25</a> | tumor necrosis factor receptor superfamily, member 25 |
| 56 | 0.00213   | 1 | 0.015873  | 58.87  | 40.13  | 1.47 | <a href="#">230647_at</a>   | <a href="#">Info</a> | <a href="#">TMEM53</a>   | transmembrane protein 53                              |
| 57 | 0.0021351 | 1 | 0.0079365 | 259.79 | 189.98 | 1.37 | <a href="#">218364_at</a>   | <a href="#">Info</a> | <a href="#">LRRFIP2</a>  | leucine rich repeat (in FLII) interacting protein 2   |
| 58 | 0.0021689 | 1 | 0.0079365 | 43.36  | 66.18  | 0.66 | <a href="#">1564211_at</a>  | <a href="#">Info</a> | <a href="#">C14orf64</a> | chromosome 14 open reading frame 64                   |
| 59 | 0.0021783 | 1 | 0.0079365 | 224.82 | 610.54 | 0.37 | <a href="#">209750_at</a>   | <a href="#">Info</a> | <a href="#">NR1D2</a>    | nuclear receptor subfamily 1, group D, member 2       |
| 60 | 0.0022027 | 1 | 0.0079365 | 340.69 | 263.88 | 1.29 | <a href="#">65591_at</a>    | <a href="#">Info</a> | <a href="#">WDR48</a>    | WD repeat domain 48                                   |
| 61 | 0.0022199 | 1 | 0.0238095 | 45.98  | 29.41  | 1.56 | <a href="#">232352_at</a>   | <a href="#">Info</a> | <a href="#">ISL2</a>     | ISL LIM homeobox 2                                    |
| 62 | 0.0022371 | 1 | 0.0079365 | 12.81  | 9.86   | 1.3  | <a href="#">240090_at</a>   | <a href="#">Info</a> | <a href="#">NA</a>       | NA                                                    |
| 63 | 0.0023113 | 1 | 0.0238095 | 110.96 | 255.3  | 0.43 | <a href="#">236595_at</a>   | <a href="#">Info</a> | <a href="#">NA</a>       | NA                                                    |

|    |           |   |           |         |         |      |                              |                      |                           |                                                                                     |
|----|-----------|---|-----------|---------|---------|------|------------------------------|----------------------|---------------------------|-------------------------------------------------------------------------------------|
| 64 | 0.00235   | 1 | 0.015873  | 2245.36 | 3285.59 | 0.68 | <a href="#">203408_s_at</a>  | <a href="#">Info</a> | <a href="#">SATB1</a>     | SATB homeobox 1                                                                     |
| 65 | 0.002353  | 1 | 0.0238095 | 365.78  | 225.94  | 1.62 | <a href="#">210422_x_at</a>  | <a href="#">Info</a> | <a href="#">SLC11A1</a>   | solute carrier family 11 (proton-coupled divalent metal ion transporters), member 1 |
| 66 | 0.0023936 | 1 | 0.0079365 | 53.09   | 87.67   | 0.61 | <a href="#">215211_at</a>    | <a href="#">Info</a> | <a href="#">LOC730092</a> | RRN3 RNA polymerase I transcription factor homolog (S. cerevisiae) pseudogene       |
| 67 | 0.0023987 | 1 | 0.0079365 | 15.97   | 11.74   | 1.36 | <a href="#">230657_at</a>    | <a href="#">Info</a> | <a href="#">NA</a>        | NA                                                                                  |
| 68 | 0.0024533 | 1 | 0.015873  | 902.08  | 657.71  | 1.37 | <a href="#">1552264_a_at</a> | <a href="#">Info</a> | <a href="#">MAPK1</a>     | mitogen-activated protein kinase 1                                                  |
| 69 | 0.0024884 | 1 | 0.015873  | 123.26  | 62.52   | 1.97 | <a href="#">217889_s_at</a>  | <a href="#">Info</a> | <a href="#">CYBRD1</a>    | cytochrome b reductase 1                                                            |
| 70 | 0.0025296 | 1 | 0.0079365 | 293.85  | 198.79  | 1.48 | <a href="#">222157_s_at</a>  | <a href="#">Info</a> | <a href="#">WDR48</a>     | WD repeat domain 48                                                                 |
| 71 | 0.0025454 | 1 | 0.015873  | 32.07   | 45.19   | 0.71 | <a href="#">1554929_at</a>   | <a href="#">Info</a> | <a href="#">QSK</a>       | serine/threonine-protein kinase QSK                                                 |
| 72 | 0.0025649 | 1 | 0.0238095 | 750.18  | 1449.8  | 0.52 | <a href="#">206337_at</a>    | <a href="#">Info</a> | <a href="#">CCR7</a>      | chemokine (C-C motif) receptor 7                                                    |
| 73 | 0.0025989 | 1 | 0.0079365 | 23.29   | 17.81   | 1.31 | <a href="#">222680_s_at</a>  | <a href="#">Info</a> | <a href="#">DTL</a>       | denticless homolog (Drosophila)                                                     |
| 74 | 0.0026114 | 1 | 0.0079365 | 904.27  | 1492.2  | 0.61 | <a href="#">200965_s_at</a>  | <a href="#">Info</a> | <a href="#">ABLIM1</a>    | actin binding LIM protein 1                                                         |
| 75 | 0.0026663 | 1 | 0.0079365 | 205.99  | 99.24   | 2.08 | <a href="#">207500_at</a>    | <a href="#">Info</a> | <a href="#">CASP5</a>     | caspase 5, apoptosis-related cysteine peptidase                                     |
| 76 | 0.002673  | 1 | 0.0238095 | 113.92  | 188.55  | 0.6  | <a href="#">1562731_s_at</a> | <a href="#">Info</a> | <a href="#">MDS2</a>      | myelodysplastic syndrome 2 translocation associated                                 |
| 77 | 0.0026873 | 1 | 0.0079365 | 169.46  | 238.58  | 0.71 | <a href="#">239388_at</a>    | <a href="#">Info</a> | <a href="#">NA</a>        | NA                                                                                  |
| 78 | 0.0026955 | 1 | 0.015873  | 19.33   | 33.29   | 0.58 | <a href="#">230552_at</a>    | <a href="#">Info</a> | <a href="#">NA</a>        | NA                                                                                  |
| 7  | 0.0028    | 1 | 0.0238    | 146.5   | 249.6   | 0.59 | <a href="#">228109</a>       | <a href="#">Info</a> | <a href="#">RASGR</a>     | Ras protein-specific                                                                |

|    |           |   |           |        |        |      |                             |                      |                           |                                                               |
|----|-----------|---|-----------|--------|--------|------|-----------------------------|----------------------|---------------------------|---------------------------------------------------------------|
| 9  | 175       |   | 095       | 4      | 7      |      | <a href="#">_at</a>         |                      | <a href="#">F2</a>        | guanine nucleotide-releasing factor 2                         |
| 80 | 0.0028981 | 1 | 0.0079365 | 16.49  | 12.92  | 1.28 | <a href="#">208552_at</a>   | <a href="#">Info</a> | <a href="#">GRIK4</a>     | glutamate receptor, ionotropic, kainate 4                     |
| 81 | 0.0029023 | 1 | 0.0079365 | 40.81  | 27.18  | 1.5  | <a href="#">241841_at</a>   | <a href="#">Info</a> | <a href="#">NA</a>        | NA                                                            |
| 82 | 0.0029084 | 1 | 0.015873  | 23.21  | 17.74  | 1.31 | <a href="#">236477_at</a>   | <a href="#">Info</a> | <a href="#">PRPF40A</a>   | PRP40 pre-mRNA processing factor 40 homolog A (S. cerevisiae) |
| 83 | 0.0029198 | 1 | 0.015873  | 628.01 | 430.35 | 1.46 | <a href="#">216942_s_at</a> | <a href="#">Info</a> | <a href="#">CD58</a>      | CD58 molecule                                                 |
| 84 | 0.0029252 | 1 | 0.0079365 | 33.75  | 46.41  | 0.73 | <a href="#">236260_at</a>   | <a href="#">Info</a> | <a href="#">NA</a>        | NA                                                            |
| 85 | 0.002947  | 1 | 0.0079365 | 23.66  | 17.2   | 1.38 | <a href="#">240661_at</a>   | <a href="#">Info</a> | <a href="#">LOC284475</a> | hypothetical protein LOC284475                                |
| 86 | 0.0029615 | 1 | 0.015873  | 36.58  | 50.07  | 0.73 | <a href="#">235616_at</a>   | <a href="#">Info</a> | <a href="#">TSHZ2</a>     | teashirt zinc finger homeobox 2                               |
| 87 | 0.0029731 | 1 | 0.0238095 | 122.86 | 182.12 | 0.67 | <a href="#">201829_at</a>   | <a href="#">Info</a> | <a href="#">NET1</a>      | neuroepithelial cell transforming 1                           |
| 88 | 0.0029851 | 1 | 0.015873  | 37.55  | 27.91  | 1.35 | <a href="#">227055_at</a>   | <a href="#">Info</a> | <a href="#">METTL7B</a>   | methyltransferase like 7B                                     |
| 89 | 0.0029949 | 1 | 0.0238095 | 411.65 | 662.69 | 0.62 | <a href="#">227867_at</a>   | <a href="#">Info</a> | <a href="#">LOC129293</a> | hypothetical protein LOC129293                                |
| 90 | 0.0029949 | 1 | 0.0079365 | 20.5   | 15.49  | 1.32 | <a href="#">215150_at</a>   | <a href="#">Info</a> | <a href="#">YOD1</a>      | YOD1 OTU deubiquinating enzyme 1 homolog (S. cerevisiae)      |
| 91 | 0.0030412 | 1 | 0.0079365 | 119.84 | 92.21  | 1.3  | <a href="#">236449_at</a>   | <a href="#">Info</a> | <a href="#">NA</a>        | NA                                                            |
| 92 | 0.0030634 | 1 | 0.015873  | 46.85  | 75.85  | 0.62 | <a href="#">229497_at</a>   | <a href="#">Info</a> | <a href="#">ANKD1A</a>    | ankyrin repeat and death domain containing 1A                 |
| 93 | 0.0030654 | 1 | 0.0079365 | 199.75 | 144.67 | 1.38 | <a href="#">204001_at</a>   | <a href="#">Info</a> | <a href="#">SNAPC3</a>    | small nuclear RNA activating complex, polypeptide 3, 50kDa    |
| 94 | 0.003094  | 1 | 0.0079365 | 58.07  | 45.73  | 1.27 | <a href="#">230633_at</a>   | <a href="#">Info</a> | <a href="#">TMEM102</a>   | transmembrane protein 102                                     |
| 95 | 0.0030962 | 1 | 0.0238095 | 447.63 | 317.35 | 1.41 | <a href="#">203583_at</a>   | <a href="#">Info</a> | <a href="#">UNC50</a>     | unc-50 homolog (C. elegans)                                   |

|     |           |   |           |         |        |      |                             |                      |                          |                                                              |
|-----|-----------|---|-----------|---------|--------|------|-----------------------------|----------------------|--------------------------|--------------------------------------------------------------|
| 96  | 0.0031327 | 1 | 0.0079365 | 359.02  | 966.16 | 0.37 | <a href="#">219228_at</a>   | <a href="#">Info</a> | <a href="#">ZNF331</a>   | zinc finger protein 331                                      |
| 97  | 0.0031489 | 1 | 0.015873  | 9.92    | 13.61  | 0.73 | <a href="#">1570357_at</a>  | <a href="#">Info</a> | <a href="#">STX8</a>     | syntaxin 8                                                   |
| 98  | 0.0031909 | 1 | 0.0238095 | 1316.13 | 1969.6 | 0.67 | <a href="#">226905_at</a>   | <a href="#">Info</a> | <a href="#">FAM101B</a>  | family with sequence similarity 101, member B                |
| 99  | 0.0031963 | 1 | 0.015873  | 1270.49 | 861.04 | 1.48 | <a href="#">205173_x_at</a> | <a href="#">Info</a> | <a href="#">CD58</a>     | CD58 molecule                                                |
| 100 | 0.0032125 | 1 | 0.015873  | 30.11   | 21.04  | 1.43 | <a href="#">221149_at</a>   | <a href="#">Info</a> | <a href="#">GPR77</a>    | G protein-coupled receptor 77                                |
| 101 | 0.0032239 | 1 | 0.015873  | 37.21   | 61.72  | 0.6  | <a href="#">207926_at</a>   | <a href="#">Info</a> | <a href="#">GP5</a>      | glycoprotein V (platelet)                                    |
| 102 | 0.0032332 | 1 | 0.015873  | 328.75  | 608.37 | 0.54 | <a href="#">204642_at</a>   | <a href="#">Info</a> | <a href="#">S1PR1</a>    | sphingosine-1-phosphate receptor 1                           |
| 103 | 0.0032475 | 1 | 0.015873  | 359.63  | 243.41 | 1.48 | <a href="#">226668_at</a>   | <a href="#">Info</a> | <a href="#">WDSUB1</a>   | WD repeat, sterile alpha motif and U-box domain containing 1 |
| 104 | 0.0032788 | 1 | 0.0079365 | 796.74  | 553.15 | 1.44 | <a href="#">55692_at</a>    | <a href="#">Info</a> | <a href="#">ELMO2</a>    | engulfment and cell motility 2                               |
| 105 | 0.0033009 | 1 | 0.0079365 | 33.73   | 26.11  | 1.29 | <a href="#">225018_at</a>   | <a href="#">Info</a> | <a href="#">SPIRE1</a>   | spire homolog 1 (Drosophila)                                 |
| 106 | 0.003317  | 1 | 0.015873  | 835.14  | 564.8  | 1.48 | <a href="#">226673_at</a>   | <a href="#">Info</a> | <a href="#">SH2D3C</a>   | SH2 domain containing 3C                                     |
| 107 | 0.0033594 | 1 | 0.0079365 | 15.48   | 10.01  | 1.55 | <a href="#">230399_at</a>   | <a href="#">Info</a> | <a href="#">NA</a>       | NA                                                           |
| 108 | 0.0033621 | 1 | 0.015873  | 48.7    | 82.54  | 0.59 | <a href="#">1559097_at</a>  | <a href="#">Info</a> | <a href="#">C14orf64</a> | chromosome 14 open reading frame 64                          |
| 109 | 0.0033636 | 1 | 0.015873  | 16.35   | 22.57  | 0.72 | <a href="#">233416_at</a>   | <a href="#">Info</a> | <a href="#">NA</a>       | NA                                                           |
| 1   | 0.0034    | 1 | 0.0158    | 219.3   | 111.2  | 1.97 | <a href="#">218701</a>      | <a href="#">Info</a> | <a href="#">LACTB</a>    | lactamase, beta 2                                            |

|             |               |   |               |            |            |      |                             |                      |                          |                                                                             |
|-------------|---------------|---|---------------|------------|------------|------|-----------------------------|----------------------|--------------------------|-----------------------------------------------------------------------------|
| 1<br>0      | 108           |   | 73            | 9          | 8          |      | <a href="#">_at</a>         |                      | <a href="#">2</a>        |                                                                             |
| 1<br>1<br>1 | 0.0034<br>16  | 1 | 0.0079<br>365 | 51.87      | 29.7       | 1.75 | <a href="#">234994_at</a>   | <a href="#">Info</a> | <a href="#">TMEM200A</a> | transmembrane protein 200A                                                  |
| 1<br>1<br>2 | 0.0034<br>217 | 1 | 0.0158<br>73  | 198.8<br>9 | 97.52      | 2.04 | <a href="#">239740_at</a>   | <a href="#">Info</a> | <a href="#">ETV6</a>     | ets variant 6                                                               |
| 1<br>1<br>3 | 0.0034<br>231 | 1 | 0.0158<br>73  | 216.7<br>8 | 306.8<br>6 | 0.71 | <a href="#">223007_s_at</a> | <a href="#">Info</a> | <a href="#">C9orf5</a>   | chromosome 9 open reading frame 5                                           |
| 1<br>1<br>4 | 0.0034<br>355 | 1 | 0.0238<br>095 | 587.7<br>3 | 389.9<br>8 | 1.51 | <a href="#">221735_at</a>   | <a href="#">Info</a> | <a href="#">WDR48</a>    | WD repeat domain 48                                                         |
| 1<br>1<br>5 | 0.0034<br>487 | 1 | 0.0158<br>73  | 11.01      | 8.61       | 1.28 | <a href="#">214967_at</a>   | <a href="#">Info</a> | <a href="#">NA</a>       | NA                                                                          |
| 1<br>1<br>6 | 0.0034<br>812 | 1 | 0.0079<br>365 | 21.49      | 15.44      | 1.39 | <a href="#">237054_at</a>   | <a href="#">Info</a> | <a href="#">ENPP5</a>    | ectonucleotide pyrophosphatase/phosphodiesterase 5 (putative function)      |
| 1<br>1<br>7 | 0.0035<br>965 | 1 | 0.0158<br>73  | 170.1<br>2 | 126.1<br>5 | 1.35 | <a href="#">225686_at</a>   | <a href="#">Info</a> | <a href="#">SKA2</a>     | spindle and kinetochore associated complex subunit 2                        |
| 1<br>1<br>8 | 0.0036<br>226 | 1 | 0.0158<br>73  | 284.4<br>6 | 156.6      | 1.82 | <a href="#">218943_s_at</a> | <a href="#">Info</a> | <a href="#">DDX58</a>    | DEAD (Asp-Glu-Ala-Asp) box polypeptide 58                                   |
| 1<br>1<br>9 | 0.0036<br>458 | 1 | 0.0079<br>365 | 56.45      | 74.21      | 0.76 | <a href="#">239925_at</a>   | <a href="#">Info</a> | <a href="#">NA</a>       | NA                                                                          |
| 1<br>2<br>0 | 0.0037<br>325 | 1 | 0.0158<br>73  | 26.97      | 43.06      | 0.63 | <a href="#">212096_s_at</a> | <a href="#">Info</a> | <a href="#">MTUS1</a>    | mitochondrial tumor suppressor 1                                            |
| 1<br>2<br>1 | 0.0037<br>402 | 1 | 0.0079<br>365 | 215.4<br>6 | 278.8<br>7 | 0.77 | <a href="#">208614_s_at</a> | <a href="#">Info</a> | <a href="#">FLNB</a>     | filamin B, beta                                                             |
| 1<br>2<br>2 | 0.0037<br>438 | 1 | 0.0079<br>365 | 74.79      | 128.8<br>9 | 0.58 | <a href="#">156965_2_at</a> | <a href="#">Info</a> | <a href="#">MLLT3</a>    | myeloid/lymphoid or mixed-lineage leukemia (trithorax homolog, Drosophila); |



|             |               |   |               |              |             |      |                                 |                      |                                |                                                                                    |
|-------------|---------------|---|---------------|--------------|-------------|------|---------------------------------|----------------------|--------------------------------|------------------------------------------------------------------------------------|
|             |               |   |               |              |             |      |                                 |                      |                                | translocated to, 3                                                                 |
| 1<br>2<br>3 | 0.0037<br>71  | 1 | 0.0079<br>365 | 123.9<br>8   | 172.0<br>7  | 0.72 | <a href="#">228661<br/>s_at</a> | <a href="#">Info</a> | <a href="#">NA</a>             | NA                                                                                 |
| 1<br>2<br>4 | 0.0038<br>072 | 1 | 0.0079<br>365 | 117.4<br>9   | 85.23       | 1.38 | <a href="#">210813<br/>s_at</a> | <a href="#">Info</a> | <a href="#">XRCC4</a>          | X-ray repair<br>complementing<br>defective repair in<br>Chinese hamster<br>cells 4 |
| 1<br>2<br>5 | 0.0038<br>246 | 1 | 0.0079<br>365 | 254.0<br>6   | 177.0<br>2  | 1.44 | <a href="#">200979<br/>at</a>   | <a href="#">Info</a> | <a href="#">PDHA1</a>          | pyruvate<br>dehydrogenase<br>(lipoamide) alpha 1                                   |
| 1<br>2<br>6 | 0.0038<br>463 | 1 | 0.0158<br>73  | 353.7<br>9   | 264.6<br>7  | 1.34 | <a href="#">218049<br/>s_at</a> | <a href="#">Info</a> | <a href="#">MRPL1<br/>3</a>    | mitochondrial<br>ribosomal protein<br>L13                                          |
| 1<br>2<br>7 | 0.0039<br>152 | 1 | 0.0079<br>365 | 15.9         | 10.75       | 1.48 | <a href="#">241981<br/>at</a>   | <a href="#">Info</a> | <a href="#">FAM20<br/>A</a>    | family with<br>sequence similarity<br>20, member A                                 |
| 1<br>2<br>8 | 0.0039<br>173 | 1 | 0.0238<br>095 | 598.3        | 391.9<br>6  | 1.53 | <a href="#">155226<br/>3_at</a> | <a href="#">Info</a> | <a href="#">MAPK1</a>          | mitogen-activated<br>protein kinase 1                                              |
| 1<br>2<br>9 | 0.0040<br>49  | 1 | 0.0238<br>095 | 51.97        | 89.58       | 0.58 | <a href="#">227984<br/>at</a>   | <a href="#">Info</a> | <a href="#">LOC650<br/>392</a> | hypothetical protein<br>LOC650392                                                  |
| 1<br>3<br>0 | 0.0040<br>606 | 1 | 0.0238<br>095 | 115.3        | 60.53       | 1.9  | <a href="#">214510<br/>at</a>   | <a href="#">Info</a> | <a href="#">GPR20</a>          | G protein-coupled<br>receptor 20                                                   |
| 1<br>3<br>1 | 0.0040<br>652 | 1 | 0.0079<br>365 | 198.4<br>9   | 252.6       | 0.79 | <a href="#">213254<br/>at</a>   | <a href="#">Info</a> | <a href="#">TNRC6<br/>B</a>    | trinucleotide repeat<br>containing 6B                                              |
| 1<br>3<br>2 | 0.0040<br>903 | 1 | 0.0158<br>73  | 426.3<br>4   | 323.5<br>9  | 1.32 | <a href="#">203714<br/>s_at</a> | <a href="#">Info</a> | <a href="#">TBCE</a>           | tubulin folding<br>cofactor E                                                      |
| 1<br>3<br>3 | 0.0041<br>817 | 1 | 0.0079<br>365 | 217.8<br>9   | 162.1<br>7  | 1.34 | <a href="#">215923<br/>s_at</a> | <a href="#">Info</a> | <a href="#">PSD4</a>           | pleckstrin and Sec7<br>domain containing 4                                         |
| 1<br>3<br>4 | 0.0041<br>892 | 1 | 0.0238<br>095 | 19762<br>.36 | 4524.<br>98 | 4.37 | <a href="#">214414<br/>x_at</a> | <a href="#">Info</a> | <a href="#">NA</a>             | NA                                                                                 |
| 1<br>3<br>5 | 0.0041<br>908 | 1 | 0.0079<br>365 | 42.74        | 31.8        | 1.34 | <a href="#">229671<br/>s_at</a> | <a href="#">Info</a> | <a href="#">C21orf4<br/>5</a>  | chromosome 21<br>open reading frame<br>45                                          |

|             |               |   |               |             |            |      |                                 |                      |                               |                                                                                                 |
|-------------|---------------|---|---------------|-------------|------------|------|---------------------------------|----------------------|-------------------------------|-------------------------------------------------------------------------------------------------|
| 1<br>3<br>6 | 0.0042<br>042 | 1 | 0.0079<br>365 | 7.6         | 9.73       | 0.78 | <a href="#">213992<br/>_at</a>  | <a href="#">Info</a> | <a href="#">COL4A<br/>6</a>   | collagen, type IV,<br>alpha 6                                                                   |
| 1<br>3<br>7 | 0.0042<br>122 | 1 | 0.0238<br>095 | 202.2<br>6  | 320.5      | 0.63 | <a href="#">239122<br/>_at</a>  | <a href="#">Info</a> | <a href="#">NA</a>            | NA                                                                                              |
| 1<br>3<br>8 | 0.0042<br>243 | 1 | 0.0238<br>095 | 27.86       | 43.11      | 0.65 | <a href="#">155941<br/>3_at</a> | <a href="#">Info</a> | <a href="#">TCP11L<br/>2</a>  | t-complex 11<br>(mouse)-like 2                                                                  |
| 1<br>3<br>9 | 0.0042<br>357 | 1 | 0.0158<br>73  | 337.4<br>6  | 236.5<br>9 | 1.43 | <a href="#">207765<br/>s_at</a> | <a href="#">Info</a> | <a href="#">KIAA15<br/>39</a> | KIAA1539                                                                                        |
| 1<br>4<br>0 | 0.0042<br>711 | 1 | 0.0158<br>73  | 112.7<br>5  | 83.24      | 1.35 | <a href="#">201714<br/>_at</a>  | <a href="#">Info</a> | <a href="#">TUBG1</a>         | tubulin, gamma 1                                                                                |
| 1<br>4<br>1 | 0.0043<br>059 | 1 | 0.0238<br>095 | 188.6       | 107.8<br>5 | 1.75 | <a href="#">228619<br/>x_at</a> | <a href="#">Info</a> | <a href="#">TIPRL</a>         | TIP41, TOR<br>signaling pathway<br>regulator-like (S.<br>cerevisiae)                            |
| 1<br>4<br>2 | 0.0043<br>081 | 1 | 0.0079<br>365 | 1241.<br>97 | 980.9<br>9 | 1.27 | <a href="#">202266<br/>_at</a>  | <a href="#">Info</a> | <a href="#">TTRAP</a>         | TRAF and TNF<br>receptor associated<br>protein                                                  |
| 1<br>4<br>3 | 0.0043<br>467 | 1 | 0.0158<br>73  | 78.83       | 58.94      | 1.34 | <a href="#">217777<br/>s_at</a> | <a href="#">Info</a> | <a href="#">PTPLA<br/>D1</a>  | protein tyrosine<br>phosphatase-like A<br>domain containing 1                                   |
| 1<br>4<br>4 | 0.0043<br>569 | 1 | 0.0158<br>73  | 182.1       | 71.78      | 2.54 | <a href="#">207194<br/>s_at</a> | <a href="#">Info</a> | <a href="#">ICAM4</a>         | intercellular<br>adhesion molecule 4<br>(Landsteiner-Wiener<br>blood group)                     |
| 1<br>4<br>5 | 0.0043<br>602 | 1 | 0.0238<br>095 | 515.4<br>5  | 273.2<br>3 | 1.89 | <a href="#">222453<br/>_at</a>  | <a href="#">Info</a> | <a href="#">CYBRD<br/>1</a>   | cytochrome b<br>reductase 1                                                                     |
| 1<br>4<br>6 | 0.0043<br>713 | 1 | 0.0079<br>365 | 10.32       | 8.16       | 1.27 | <a href="#">206950<br/>_at</a>  | <a href="#">Info</a> | <a href="#">SCN9A</a>         | sodium channel,<br>voltage-gated, type<br>IX, alpha subunit                                     |
| 1<br>4<br>7 | 0.0043<br>815 | 1 | 0.0238<br>095 | 1359.<br>8  | 732.0<br>9 | 1.86 | <a href="#">210423<br/>s_at</a> | <a href="#">Info</a> | <a href="#">SLC11A<br/>1</a>  | solute carrier family<br>11 (proton-coupled<br>divalent metal ion<br>transporters),<br>member 1 |
| 1<br>4      | 0.0043<br>874 | 1 | 0.0238<br>095 | 55.91       | 118.0<br>3 | 0.47 | <a href="#">204749<br/>_at</a>  | <a href="#">Info</a> | <a href="#">NAP1L<br/>3</a>   | nucleosome<br>assembly protein 1-                                                               |

|     |           |   |           |         |         |      |                             |                      |                            |                                                   |
|-----|-----------|---|-----------|---------|---------|------|-----------------------------|----------------------|----------------------------|---------------------------------------------------|
| 8   |           |   |           |         |         |      |                             |                      |                            | like 3                                            |
| 149 | 0.0043953 | 1 | 0.015873  | 59.77   | 44.49   | 1.34 | <a href="#">233812_at</a>   | <a href="#">Info</a> | <a href="#">NCRNA00028</a> | non-protein coding RNA 28                         |
| 150 | 0.0044252 | 1 | 0.015873  | 9.42    | 7.55    | 1.25 | <a href="#">223599_at</a>   | <a href="#">Info</a> | <a href="#">TRIM6</a>      | tripartite motif-containing 6                     |
| 151 | 0.004437  | 1 | 0.015873  | 97.29   | 70.87   | 1.37 | <a href="#">225521_at</a>   | <a href="#">Info</a> | <a href="#">ANAPC7</a>     | anaphase promoting complex subunit 7              |
| 152 | 0.0044797 | 1 | 0.015873  | 430.63  | 551.21  | 0.78 | <a href="#">225077_at</a>   | <a href="#">Info</a> | <a href="#">CHD2</a>       | chromodomain helicase DNA binding protein 2       |
| 153 | 0.0045098 | 1 | 0.015873  | 256.45  | 381.11  | 0.67 | <a href="#">1552633_at</a>  | <a href="#">Info</a> | <a href="#">ZNF101</a>     | zinc finger protein 101                           |
| 154 | 0.0045303 | 1 | 0.0079365 | 692.3   | 1047.21 | 0.66 | <a href="#">225262_at</a>   | <a href="#">Info</a> | <a href="#">FOSL2</a>      | FOS-like antigen 2                                |
| 155 | 0.0045375 | 1 | 0.031746  | 14763.3 | 2292.73 | 6.44 | <a href="#">211699_x_at</a> | <a href="#">Info</a> | <a href="#">NA</a>         | NA                                                |
| 156 | 0.0045449 | 1 | 0.0238095 | 17.16   | 23.98   | 0.72 | <a href="#">205372_at</a>   | <a href="#">Info</a> | <a href="#">PLAG1</a>      | pleiomorphic adenoma gene 1                       |
| 157 | 0.0045807 | 1 | 0.015873  | 10.41   | 13.45   | 0.77 | <a href="#">236952_at</a>   | <a href="#">Info</a> | <a href="#">NA</a>         | NA                                                |
| 158 | 0.0045971 | 1 | 0.0238095 | 8355.56 | 5403.36 | 1.55 | <a href="#">212203_x_at</a> | <a href="#">Info</a> | <a href="#">IFITM3</a>     | interferon induced transmembrane protein 3 (1-8U) |
| 159 | 0.0046423 | 1 | 0.015873  | 54.15   | 70.03   | 0.77 | <a href="#">243111_at</a>   | <a href="#">Info</a> | <a href="#">NA</a>         | NA                                                |
| 160 | 0.0046608 | 1 | 0.0238095 | 158.5   | 245.54  | 0.65 | <a href="#">204143_s_at</a> | <a href="#">Info</a> | <a href="#">ENOSF1</a>     | enolase superfamily member 1                      |
| 161 | 0.0046672 | 1 | 0.0079365 | 18.25   | 14.56   | 1.25 | <a href="#">206726_at</a>   | <a href="#">Info</a> | <a href="#">HPGDS</a>      | hematopoietic prostaglandin D synthase            |
| 1   | 0.0046    | 1 | 0.0317    | 99.31   | 217.2   | 0.46 | <a href="#">233127</a>      | <a href="#">Info</a> | <a href="#">NA</a>         | NA                                                |

|             |               |   |               |            |            |      |                             |                      |                        |                                                 |
|-------------|---------------|---|---------------|------------|------------|------|-----------------------------|----------------------|------------------------|-------------------------------------------------|
| 6<br>2      | 942           |   | 46            |            | 7          |      | <a href="#">_at</a>         |                      |                        |                                                 |
| 1<br>6<br>3 | 0.0047<br>089 | 1 | 0.0158<br>73  | 137.7<br>6 | 196.0<br>3 | 0.7  | <a href="#">226528_at</a>   | <a href="#">Info</a> | <a href="#">MTX3</a>   | metaxin 3                                       |
| 1<br>6<br>4 | 0.0048<br>891 | 1 | 0.0238<br>095 | 68.88      | 96.12      | 0.72 | <a href="#">201596_x_at</a> | <a href="#">Info</a> | <a href="#">KRT18</a>  | keratin 18                                      |
| 1<br>6<br>5 | 0.0049<br>276 | 1 | 0.0079<br>365 | 148.9<br>7 | 113.1<br>8 | 1.32 | <a href="#">230279_at</a>   | <a href="#">Info</a> | <a href="#">NA</a>     | NA                                              |
| 1<br>6<br>6 | 0.0049<br>312 | 1 | 0.0079<br>365 | 716.0<br>9 | 572.6      | 1.25 | <a href="#">201725_at</a>   | <a href="#">Info</a> | <a href="#">CDC123</a> | cell division cycle 123 homolog (S. cerevisiae) |

**'Observed v. Expected' table of GO classes and parent classes, in list of 166 genes shown above:**

Only GO classes and parent classes with at least 5 observations in the selected subset and with an 'Observed vs. Expected' ratio of at least 2 are shown.

**Cellular Component**

| GO ID      | GO Term                       | Observed in selected subset | Expected in selected subset | Observed/Expected |
|------------|-------------------------------|-----------------------------|-----------------------------|-------------------|
| GO:0030659 | cytoplasmic vesicle membrane  | 5                           | 0.75                        | 6.64              |
| GO:0012506 | vesicle membrane              | 5                           | 0.82                        | 6.07              |
| GO:0044433 | cytoplasmic vesicle part      | 5                           | 1.03                        | 4.85              |
| GO:0005815 | microtubule organizing center | 7                           | 1.82                        | 3.85              |
| GO:0005840 | ribosome                      | 6                           | 2.28                        | 2.63              |

**Molecular Function**

| GO ID      | GO Term                                      | Observed in selected subset | Expected in selected subset | Observed/Expected |
|------------|----------------------------------------------|-----------------------------|-----------------------------|-------------------|
| GO:0005085 | guanyl-nucleotide exchange factor activity   | 6                           | 1.32                        | 4.54              |
| GO:0043565 | sequence-specific DNA binding                | 7                           | 3.22                        | 2.18              |
| GO:0030695 | GTPase regulator activity                    | 7                           | 3.32                        | 2.11              |
| GO:0060589 | nucleoside-triphosphatase regulator activity | 7                           | 3.38                        | 2.07              |

**Biological Process**

| <b>GO ID</b> | <b>GO Term</b>                                                      | <b>Observed<br/>in<br/>selected<br/>subset</b> | <b>Expected<br/>in<br/>selected<br/>subset</b> | <b>Observed/<br/>Expected</b> |
|--------------|---------------------------------------------------------------------|------------------------------------------------|------------------------------------------------|-------------------------------|
| GO:0007265   | Ras protein signal transduction                                     | 7                                              | 2.2                                            | 3.18                          |
| GO:0007626   | locomotory behavior                                                 | 6                                              | 1.93                                           | 3.11                          |
| GO:0007169   | transmembrane receptor protein<br>tyrosine kinase signaling pathway | 6                                              | 2.08                                           | 2.89                          |
| GO:0051056   | regulation of small GTPase mediated<br>signal transduction          | 5                                              | 1.83                                           | 2.74                          |
| GO:0008284   | positive regulation of cell<br>proliferation                        | 6                                              | 2.56                                           | 2.35                          |
| GO:0030182   | neuron differentiation                                              | 8                                              | 3.46                                           | 2.31                          |
| GO:0007010   | cytoskeleton organization                                           | 9                                              | 3.92                                           | 2.3                           |
| GO:0048699   | generation of neurons                                               | 9                                              | 4.18                                           | 2.15                          |
| GO:0002520   | immune system development                                           | 7                                              | 3.33                                           | 2.1                           |
